# Supplementary material
Source: PubMed Central journal article supplement (PMC4384834)
Supplement: sb400162z_si_001.pdf [file sb400162z_si_001.pdf]

## **SUPPORTING INFORMATION**

### **Trade-offs in engineering sugar utilization pathways for titratable control**

Taliman Afroz, Konstantinos Biliouris, Kelsey E. Boykin, Yiannis Kaznessis, and Chase L. Beisel

#### **TABLE OF CONTENTS**

|                                    |     |    |
|------------------------------------|-----|----|
| Description of deterministic model | ... | 1  |
| Supporting Figures                 | ... | 7  |
| Supporting Tables                  | ... | 12 |
| Supporting References              | ... | 16 |

## DESCRIPTION OF SIMPLE MODEL

We developed a simple deterministic model comprising six ordinary differential equations to capture the dynamical behavior of utilization pathways that catabolize the inducing sugar. The model accounts for the regulator ( $R_t$ ), the extracellular ( $S_0$ ) and intracellular ( $S$ ) sugar, two transporters ( $T_H$ ,  $T_L$ ), and one enzyme ( $E$ ). Binding of  $S$  to  $R_t$  generates an active regulator ( $R$ ) that upregulates the expression of the transporters and the enzyme following the Hill equation. The transporters import sugar into the cell while the enzyme irreversibly degrades the sugar. The model also allows for the breakdown of  $S_0$  through sugar catabolism. The volume ratio of cells and medium converts between the amounts of intracellular and extracellular sugar. The following equations describe the amount of  $R$  (eq. 1),  $S_0$  (eq. 2) and  $S$  (eq. 3),  $T_H$  and  $T_L$ , (eq. 4, 5), and  $E$  (eq. 6). The equations of the model follow mass-action and Michaelis-Menten kinetics, similar to previously published studies describing sugar utilization pathway.<sup>1,2</sup>

$$R = R_t \underbrace{\frac{S}{k_0 + S}}_{\text{active regulator}} \quad (1)$$

$$\frac{dS_0}{dt} = -\alpha_3 \underbrace{\frac{S}{k_3 + S}}_{\text{catabolism of sugar}} E \underbrace{\frac{V_C}{V_M}}_{\text{volume ratio}} \quad (2)$$

$$\frac{dS}{dt} = \underbrace{\alpha_1 \frac{S_0}{k_1 + S_0} T_L}_{\text{active transport of sugar}} + \underbrace{\alpha_2 \frac{S_0}{k_2 + S_0} T_H}_{\text{active transport of sugar}} - \underbrace{\alpha_3 \frac{S}{k_3 + S} E}_{\text{catabolism of sugar}} - \underbrace{\frac{dS}{dt}}_{\text{dilution of sugar}} \quad (3)$$

$$\frac{dT_L}{dt} = \underbrace{b_{T_L}}_{\text{basal expression of low-affinity transporter}} + \underbrace{\alpha_4 \frac{R^n}{k_4^n + R^n}}_{\text{induction of low-affinity transporter by sugar}} - \underbrace{\frac{dT_L}{dt}}_{\text{dilution of low-affinity transporter}} \quad (4)$$

$$\frac{dT_H}{dt} = \underbrace{b_{T_H}}_{\text{basal expression of high-affinity transporter}} + \underbrace{\alpha_5 \frac{R^n}{k_5^n + R^n}}_{\text{induction of high-affinity transporter by sugar}} - \underbrace{\frac{dT_H}{dt}}_{\text{dilution of high-affinity transporter}} \quad (5)$$

$$\frac{dE}{dt} = \underbrace{b_E}_{\text{basal expression of enzyme}} + \underbrace{\alpha_6 \frac{R^n}{k_6^n + R^n}}_{\text{induction of enzyme by sugar}} - \underbrace{\frac{dE}{dt}}_{\text{dilution of enzyme}} \quad (6)$$

The model does not explicitly account for DNA looping<sup>1,2</sup> or auto-repression of the regulator<sup>3</sup>; instead, the model assumes that the total amount of regulator is constant and DNA looping and regulator auto-repression were indirectly incorporated by manipulating the Hill coefficient in the

expression terms. The model also neglects differences in growth rate due to the small (~20%) difference in growth rate in the presence or absence of L-arabinose (data not shown). Each parameter in the model is described below.

| Symbol     | Description (Units)                                               |
|------------|-------------------------------------------------------------------|
| R          | Concentration of active regulator (M)                             |
| $R_t$      | Concentration of total regulator (M)                              |
| S          | Intracellular concentration of sugar (M)                          |
| $S_0$      | Extracellular concentration of sugar (M)                          |
| t          | Time (s)                                                          |
| $V_C$      | Volume of the cell (M)                                            |
| $V_M$      | Volume of the medium (M)                                          |
| $T_L$      | Low-affinity transporter concentration (M)                        |
| $T_H$      | High-affinity transporter concentration (M)                       |
| E          | Enzyme concentration (M)                                          |
| $k_0$      | Half maximum regulator concentration (M)                          |
| $k_1$      | Half-maximum concentration of sugar (M)                           |
| $k_2$      | Half-maximum concentration of sugar (M)                           |
| $k_3$      | Half-maximum concentration of sugar (M)                           |
| $k_4$      | Half-maximum concentration of regulator (M)                       |
| $k_5$      | Half-maximum concentration of regulator (M)                       |
| $k_6$      | Half-maximum concentration of regulator (M)                       |
| $b_{TL}$   | Basal expression of first transporter (M/s)                       |
| $b_{TH}$   | Basal expression of second transporter (M/s)                      |
| $b_E$      | Basal expression of enzyme (M/s)                                  |
| $\alpha_1$ | Maximum rate of sugar import from low-affinity transporter (1/s)  |
| $\alpha_2$ | Maximum rate of sugar import from high-affinity transporter (1/s) |
| $\alpha_3$ | Maximum rate of sugar catabolism (M/s)                            |
| $\alpha_4$ | Maximum rate of low-affinity transporter production (M/s)         |
| $\alpha_5$ | Maximum rate of high-affinity transporter production (M/s)        |
| $\alpha_6$ | Maximum rate of enzyme production (M/s)                           |
| d          | Dilution rate due to cell division (1/s)                          |
| n          | Hill coefficient                                                  |

To reduce the total number of parameters, we first non-dimensionalized the variables as shown on the next page.

| Dimensionless variable | Formula                  |
|------------------------|--------------------------|
| $R'$                   | $R/R_t$                  |
| $S'$                   | $S/k_0$                  |
| $S_0'$                 | $S_0/k_1$                |
| $T_L'$                 | $(d/\alpha_4) \cdot T_1$ |
| $T_H'$                 | $(d/\alpha_5) \cdot T_2$ |
| $E'$                   | $(d/\alpha_6) \cdot E$   |
| $\tau$                 | $t \cdot d$              |

Non-dimensionalizing the variables resulted in the following equations:

$$R' = \frac{S'}{1 + S'} \quad (1b)$$

$$\frac{dS_0'}{d\tau} = - \frac{\alpha_3 \alpha_6}{k_0 d^2} \frac{S'}{\frac{k_3}{k_0} + S'} E' \frac{k_0}{k_1} \cdot \frac{V_C}{V_M} \quad (2b)$$

$$\frac{dS'}{d\tau} = \frac{\alpha_1 \alpha_4}{k_0 d^2} \frac{S_0'}{1 + S_0'} T_1' + \frac{\alpha_2 \alpha_5}{k_0 d^2} \frac{S_0'}{\frac{k_2}{k_1} + S_0'} T_2' - \frac{\alpha_3 \alpha_6}{k_0 d^2} \frac{S'}{\frac{k_3}{k_0} + S'} E' - S' \quad (3b)$$

$$\frac{dT_L'}{d\tau} = \frac{b_L}{\alpha_4} + \frac{(R')^n}{\left(\frac{k_4}{R_t}\right)^n + (R')^n} - T_L' \quad (4b)$$

$$\frac{dT_H'}{d\tau} = \frac{b_H}{\alpha_5} + \frac{(R')^n}{\left(\frac{k_5}{R_t}\right)^n + (R')^n} - T_H' \quad (5b)$$

$$\frac{dE'}{d\tau} = \frac{b_E}{\alpha_6} + \frac{(R')^n}{\left(\frac{k_6}{R_t}\right)^n + (R')^n} - E' \quad (6b)$$

We next assigned single constants to the lumped parameters to generate the following set of equations:

$$R' = \frac{S'}{1 + S'} \quad (1c)$$

$$\frac{dS'_0}{d\tau} = -\alpha_E \frac{S'}{K_E + S'} E' \nu \quad (2c)$$

$$\frac{dS'}{d\tau} = \alpha_L \frac{S'_0}{1 + S'_0} T'_1 + \alpha_H \frac{S'_0}{K_H + S'_0} T'_2 - \alpha_E \frac{S'}{K_E + S'} E' - S' \quad (3c)$$

$$\frac{dT'_L}{d\tau} = b'_L + \frac{(R')^n}{K_{RL}^n + (R')^n} - T'_L \quad (4c)$$

$$\frac{dT'_H}{d\tau} = b'_H + \frac{(R')^n}{K_{RH}^n + (R')^n} - T'_H \quad (5c)$$

$$\frac{dE'}{d\tau} = b'_E + \frac{(R')^n}{K_{RE}^n + (R')^n} - E' \quad (6c)$$

The final constants along with the equivalent lumped parameters are shown in the table on the next page. We selected values for each constant to capture the general behavior of the L-arabinose utilization pathway: a high-affinity/low-capacity transporter expressed at lower sugar concentrations and a low-affinity/high-capacity transporter expressed at higher sugar concentrations ( $\alpha_L > \alpha_H$ ,  $K_L > K_H$ ,  $K_{RL} > K_{RH}$ ), low basal expression ( $b'_L$ ,  $b'_H$ ,  $b'_E \ll 1$ ), proteins and sugar that are diluted through cell division, and sufficient protein expression and activity ( $\alpha_E$ ,  $K_E$ ) to yield a bistable response.

| Formula                             | Dimensionless parameter                 | Value    |
|-------------------------------------|-----------------------------------------|----------|
| $\frac{\alpha_1 \alpha_4}{k_0 d^2}$ | $\alpha_L$                              | 300      |
| $\frac{k_2}{k_0}$                   | $K_L$                                   | 0.2      |
| $\frac{\alpha_2 \alpha_5}{k_0 d^2}$ | $\alpha_H$                              | 100      |
| $\frac{k_3}{k_0}$                   | $K_E$                                   | 0.01     |
| $\frac{\alpha_3 \alpha_6}{k_0 d^2}$ | $\alpha_E$                              | 0.6      |
| $v$                                 | $\frac{k_0}{k_1} \cdot \frac{V_C}{V_M}$ | 0 – 0.01 |
| $\frac{k_4}{R_t}$                   | $K_{RL}$                                | 0.2      |
| $\frac{k_5}{R_t}$                   | $K_{RH}$                                | 0.005    |
| $\frac{k_6}{R_t}$                   | $K_{RE}$                                | 0.02     |
| $\frac{b_{T_L}}{\alpha_4}$          | $b_L'$                                  | 0.0002   |
| $\frac{b_{T_H}}{\alpha_5}$          | $b_H'$                                  | 0.0002   |
| $\frac{b_E}{\alpha_6}$              | $b_E'$                                  | 0.0002   |
| $n$                                 | $n$                                     | 2        |

These values were used in all MATLAB simulations unless indicated otherwise. The simulation results in Figure 2 neglected sugar breakdown, which involved removing the differential equation for extracellular sugar (eq. 2c). To capture constitutive expression of either transporter, we replaced the corresponding expression term  $R^2/(K_2 + R^2)$  with the indicated value. To delete either transporter or the enzyme, we set the maximal activity term equal to zero (e.g.  $\alpha_L = 0$ ). As part of the simulations that neglected sugar breakdown, we integrated the equations using Euler's

method and calculated the steady-state curves using the arc-length continuation method. When accounting for sugar breakdown, we integrated the equations to  $\tau = 10$ , which was sufficient to reach steady-state in the absence of breakdown. Altering the final value of  $\tau$  did not change the qualitative impact of sugar breakdown.

## SUPPORTING FIGURES

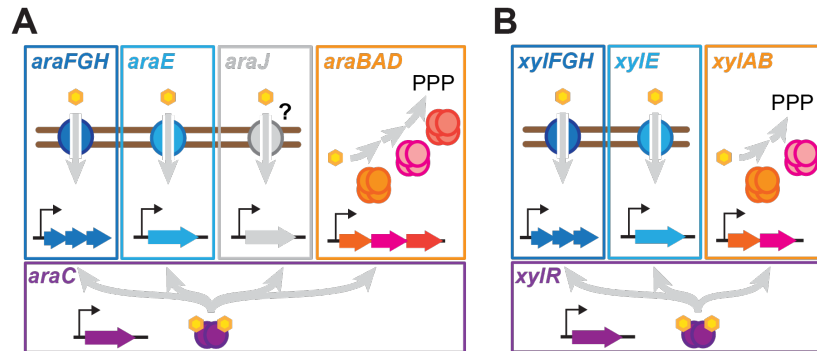

**Figure S1.** The L-arabinose and D-xylose utilization pathways in *E. coli*. (A) The pathway is composed of one regulator (*araC*), one high-affinity transporter (*araFGH*), one low-affinity transporter (*araE*), one putative transporter (*araJ*), and three enzymes (*araBAD*) that shunt L-arabinose into the pentose phosphate pathway (PPP). The AraC protein activates transcription at each promoter when bound to L-arabinose. Although the AraJ protein resembles a transporter, previous deletion of *araJ* had no measurable impact on the behavior of the pathway.<sup>4</sup> (B) The D-xylose utilization pathway is structured similarly to the L-arabinose utilization pathway, with a high-affinity transporter (*xylFGH*), a low-affinity transporter (*xylE*), two enzymes (*xylAB*) that shunt D-xylose into the pentose phosphate pathway, and a single regulator (*xylR*) responsible for activating the operons in the presence of D-xylose.



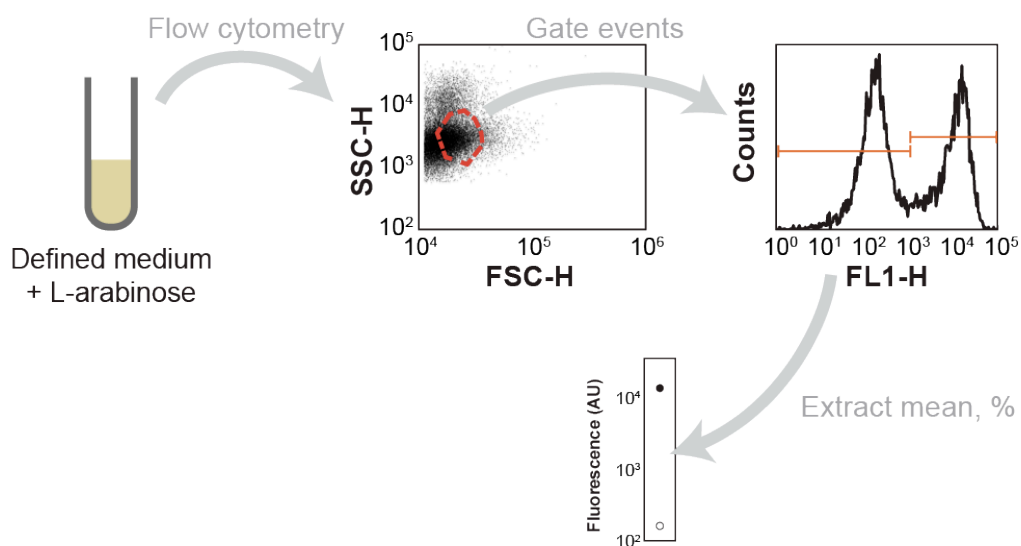

**Figure S2.** Overview of flow cytometry analysis. Cultures were diluted 1:100 in 1X PBS and run on a BD Accuri C6 personal flow cytometer. Cells were gated based on forward scatter (FSC-H) and side scatter (SSC-H). The gate (red) was selected to capture cells and no “noisy” events based on initial runs with DRAQ5 dye. Once gated, the mean fluorescence was extracted for unimodal distributions, while the mean fluorescence and relative number of events for each subpopulation were extracted for bimodal distributions.

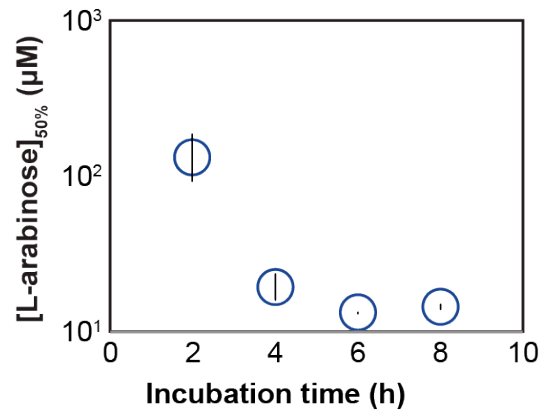

**Figure S3.** Impact of incubation time on the response to L-arabinose. Cultures of the WT strain (CB26) were grown in varying L-arabinose concentrations for the indicated amount of time to mid-log phase ( $ABS_{600} \sim 0.4$ ) and then subjected to flow cytometry analysis. The concentration to achieve 50% induced cells was estimated by extracting the percentage of the population that was induced and fitting these values to a Hill equation. Note that this approach was selected over calculating the  $EC_{50}$  value because the response curve did not saturate at the maximal L-arabinose concentration that we used (10 mM). The reported concentration values represent the geometric mean and S.E.M. from at least three independent experiments. We selected an incubation time of 6 hours for all other experiments because increasing the incubation time had no obvious effect on the response.

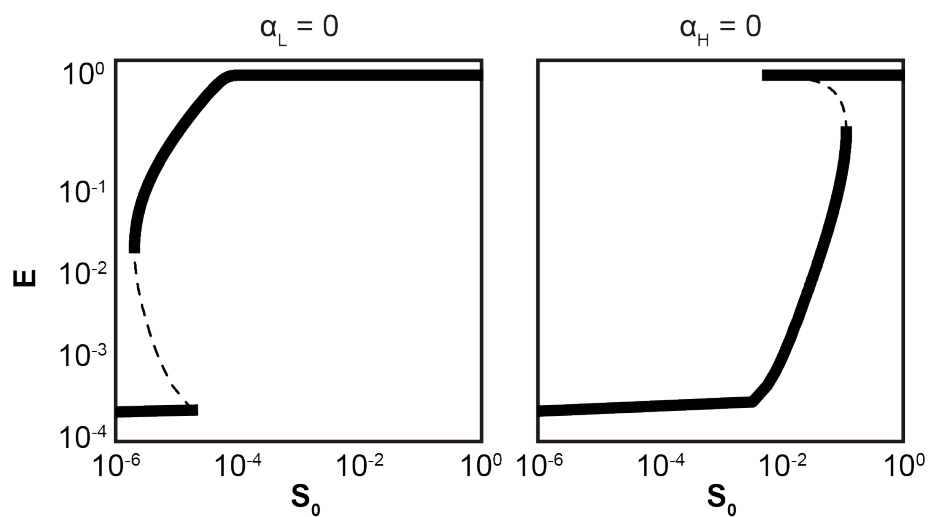

**Figure S4.** Predicted response when only one transporter is present. Model predictions reflect the base model in Figure 2 when the maximal activity of either transporter ( $\alpha_H$ ,  $\alpha_L$ ) is set equal to zero. Both transporters are sufficient for full induction of the pathway, where much lower concentrations of the extracellular sugar are needed for the high-affinity transporter than for the low-affinity transporter. Note that all variables were non-dimensionalized as part of the model derivation.

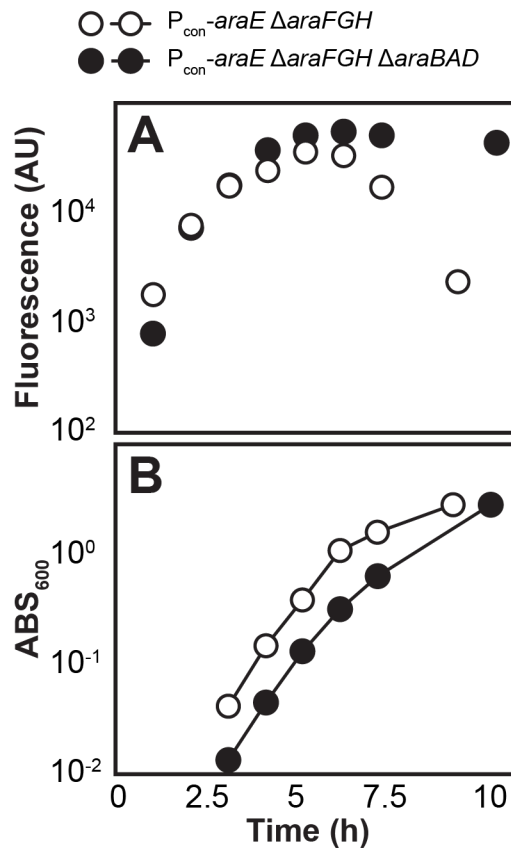

**Figure S5.** Response dynamics in the presence or absence of L-arabinose catabolism. The *P<sub>con</sub>-araE ΔaraFGH* and *P<sub>con</sub>-araE ΔaraFGH ΔaraBAD* strains harboring the pUA66-ParaB plasmid were grown in M9 minimal medium with 292 μM or 8 μM of L-arabinose, respectively. These L-arabinose concentrations reflect the approximate EC<sub>50</sub> value for each modified pathway. The ABS<sub>600</sub> (A) and single-cell fluorescence (B) were measured at the indicated times. The values represent the mean and S.E.M. from experiments conducted with three independent colonies. The error bars are smaller than each symbol at all time points. The ABS<sub>600</sub> was too low to accurately measure prior to 3 hours.

## SUPPORTING TABLES

**Table S1.** Measured growth rates for each strain. Measurements were performed in M9 glycerol with 0.2% casamino acids and either no L-arabinose (- ara) or 10 mM L-arabinose (+ ara) during exponential growth.

| Alteration                                  | Growth rate <sup>a</sup> |            |
|---------------------------------------------|--------------------------|------------|
|                                             | - ara                    | + ara      |
| None (WT)                                   | 38.6 ± 1.2               | 34.2 ± 0.7 |
| <i>ΔaraBAD</i>                              | 38.9 ± 0.2               | 48.4 ± 0.4 |
| <i>P<sub>con</sub>-araFGH</i>               | 38.7 ± 0.8               | 37.8 ± 1.6 |
| <i>P<sub>con</sub>-araFGH ΔaraBAD</i>       | 35.7 ± 0.8               | 44.6 ± 0.6 |
| <i>P<sub>con</sub>-araFGH ΔaraE</i>         | 32.2 ± 1.2               | 33 ± 1.9   |
| <i>P<sub>con</sub>-araFGH ΔaraE ΔaraBAD</i> | 36.9 ± 1.4               | 37.4 ± 0.5 |
| <i>P<sub>con</sub>-araE</i>                 | 41.5 ± 2.5               | 40.3 ± 2.3 |
| <i>P<sub>con</sub>-araE ΔaraBAD</i>         | 37.9 ± 1.2               | 42.0 ± 1.3 |
| <i>P<sub>con</sub>-araE ΔaraFGH</i>         | 34.5 ± 0.5               | 31 ± 0.6   |
| <i>P<sub>con</sub>-araE ΔaraFGH ΔaraBAD</i> | 37.7 ± 0.5               | 41.6 ± 0.8 |

<sup>a</sup> Growth rates reflect the mean and S.E. from the measurement of three independent colonies.

**Table S2.** Strains used in this study

| <b>Name</b>                                            | <b>Genotype</b>                                                                                         | <b>Stock #</b> |
|--------------------------------------------------------|---------------------------------------------------------------------------------------------------------|----------------|
| WT                                                     | <i>Escherichia coli</i> K-12 substrain MG1655                                                           | CB168          |
| $\Delta$ araBAD                                        | MG1655 $\Delta$ araBAD:: <i>cat</i>                                                                     | CB225          |
| NM400                                                  | MG1655 mini- $\lambda$ - <i>cat</i>                                                                     | CB25           |
| NM500                                                  | MG1655 mini- $\lambda$ - <i>tetA</i>                                                                    | CB26           |
| P <sub>con</sub> -araE                                 | MG1655 P <sub>araE</sub> ::[ <i>cat</i> P <sub>con</sub> ]                                              | CB325          |
| P <sub>con</sub> -araE $\Delta$ araBAD                 | MG1655 P <sub>araE</sub> ::[ <i>cat</i> P <sub>con</sub> ] $\Delta$ araBAD                              | CB326          |
| P <sub>con</sub> -araE $\Delta$ araFGH                 | MG1655 P <sub>araE</sub> ::[ <i>cat</i> P <sub>con</sub> ] $\Delta$ araFGH:: <i>bla</i>                 | CB327          |
| P <sub>con</sub> -araE $\Delta$ araFGH $\Delta$ araBAD | MG1655 P <sub>araE</sub> ::[ <i>cat</i> P <sub>con</sub> ] $\Delta$ araBAD $\Delta$ araFGH:: <i>bla</i> | CB328          |
| P <sub>con</sub> -araFGH                               | MG1655 P <sub>araF</sub> ::[ <i>cat</i> P <sub>con</sub> ]                                              | CB329          |
| P <sub>con</sub> -araFGH $\Delta$ araBAD               | MG1655 P <sub>araF</sub> ::[ <i>cat</i> P <sub>con</sub> ] $\Delta$ araBAD                              | CB330          |
| P <sub>con</sub> -araFGH $\Delta$ araE                 | MG1655 P <sub>araF</sub> ::[ <i>cat</i> P <sub>con</sub> ] $\Delta$ araE:: <i>bla</i>                   | CB331          |
| P <sub>con</sub> -araFGH $\Delta$ araE $\Delta$ araBAD | MG1655 P <sub>araF</sub> ::[ <i>cat</i> P <sub>con</sub> ] $\Delta$ araBAD $\Delta$ araE:: <i>bla</i>   | CB332          |
| P <sub>con</sub> -xylFGH                               | MG1655 P <sub>xylF</sub> ::[ <i>cat</i> P <sub>con</sub> ]                                              | CB342          |
| P <sub>con</sub> -xylFGH $\Delta$ xylAB                | MG1655 [ $\Delta$ xylAB P <sub>xylF</sub> ]::[ <i>cat</i> P <sub>con</sub> ]                            | CB343          |

**Table S3.** Plasmids used in this study.

| Name       | Description                                                                                                       | Source         | Stock # |
|------------|-------------------------------------------------------------------------------------------------------------------|----------------|---------|
| pUA66      | Low-copy plasmid (pSC101 ori) with MCS upstream of <i>gfp</i>                                                     | OpenBiosystems | pCB198  |
| pUA66ParaB | pUA66 with the <i>araB</i> promoter                                                                               | OpenBiosystems | pCB208  |
| pUA66PxylA | pUA66 with the <i>xylA</i> promoter                                                                               | OpenBiosystems | pCB289  |
| pKD3       | Plasmid encoding <i>cat</i> cassette flanked by FRT sites and a <i>bla</i> cassette.                              | Ref. 5         | pCB333  |
| pKD46      | L-arabinose-inducible expression of $\lambda$ -red genes on a plasmid with a heat-sensitive origin-of-replication | Ref. 5         | pCB13   |
| pCP20      | Heat-inducible expression of FRT on a plasmid with a heat-sensitive origin-of-replication                         | Ref. 6         | pCB44   |

**Table S4.** Oligonucleotides used in this study. Bases shown in red are part of the synthetic promoter (J23110) are shown red. Bolded bases are the homology regions for recombination into MG1655.

| Name             | Sequence                                                                      |
|------------------|-------------------------------------------------------------------------------|
| del-araBAD.fwd   | <b>TCCATACCCGTTTTTTTTGGATGGAGTGAAACGC</b> CATGGTCCATATGAATATCCTCCTTAG         |
| del-araBAD.rev   | <b>GTTTGCTGCATATCCGGTAACTGCGGCGCTAACTGACGGCAGG</b> TAGGCTGGAGCTGCTT           |
| ParaE.fwd        | <b>TCTGCTGTAAAATTAGGTGGTTAATAATAATCTCAATAATT</b> CAGTAGGCTGGAGCTGCTT          |
| ParaF.fwd        | <b>CCATTTCAAAAAC</b> TCAACGCCAGGTAATGCGGCC <b>TATTGACTGG</b> TAGGCTGGAGCTGCTT |
| J23110.rev       | <b>GCTAGCATTGTACCTAGGACTGAGCTAGCCGTAA</b> CATATGAATATCCTCCTTAG                |
| ParaE-J23110.rev | <b>GATAGTAACCATTTTTTCTGCCAGCAGAGAGTAAGAC</b> <b>GCTAGCATTGTACCTAGGACTG</b>    |
| ParaF-J23110.rev | <b>AAAGCATTACCTTTTAACTAAAAGATAAGTGACTGTGT</b> <b>GCTAGCATTGTACCTAGGACTG</b>   |
| del-araE.fwd     | <b>TGTTACGATTTTTTCACTATGCTTACTCTCTGCTGGC</b> TGATGCCTGGCAGTCCCTA              |
| del-araE.rev     | <b>GACGCCGATATTTCTCAACTTCTCGCCTGCCATCAGTTT</b> TACCAATGCTTAATCAGTGAG          |
| del-araFGH.fwd   | <b>TCATTCGTTTTTGGCCTACACAAAACGACACTAAAGCTGG</b> TGATGCCTGGCAGTCCCTA           |
| del-araFGH.rev   | <b>GACAGTGCGTTTTCGCTTTTTGCTTGTAACGGTCGAAG</b> ATTACCAATGCTTAATCAGTGAG         |
| PxylA.fwd        | <b>TATCACGAGGCCCTTTCGTCTTCACGGTGTAGGGCCTTCTGTAGT</b>                          |
| PxylA.rev        | <b>TGTATATCTCCTTCTTAAATCTAGATTACATACGCTTACCCAACACCA</b>                       |
| PxylF.fwd        | <b>GCAATAAGTACAATTGCGCAACAAAAGTAAGATCTCGGTCATAG</b> TAGGCTGGAGCTGCTT          |
| PxylF-J23110.rev | <b>GGACAGTTTTAATAAGTAACAATCACCGGATAAACGT</b> <b>GCTAGCATTGTACCTAGGACTG</b>    |
| del-xylAB.rev    | <b>GGCAACAATTCAATGAGCGATTTCTCTGGATTCGCCGCGATCG</b> TAGGCTGGAGCTGCTT           |



## SUPPORTING REFERENCES

- (1) Kuhlman, T.; Zhang, Z.; Saier, M. H., Jr; Hwa, T. *Proc. Natl. Acad. Sci. U.S.A.* **2007**, *104*, 6043–6048.
- (2) Huo, L.; Martin, K. J.; Schleif, R. *Proc. Natl. Acad. Sci. U.S.A.* **1988**, *85*, 5444–5448.
- (3) Madar, D.; Dekel, E.; Bren, A.; Alon, U. *BMC Syst Biol* **2011**, *5*, 111.
- (4) Reeder, T.; Schleif, R. *J. Bacteriol.* **1991**, *173*, 7765–7771.
- (5) Datsenko, K. A.; Wanner, B. L. *Proc. Natl. Acad. Sci. U.S.A.* **2000**, *97*, 6640–6645.
- (6) Cherepanov, P. P.; Wackernagel, W. *Gene* **1995**, *158*, 9–14.
